# Supplementary material
Source: PubMed Central journal article supplement (PMC6728569)
Supplement: DS_10.1177_0022034514525199.pdf [file DS_10.1177_0022034514525199.pdf]

J.W. Kim<sup>1,4†</sup>, H. Choi<sup>2,4†</sup>, B.C. Jeong<sup>2,4</sup>,  
S.H. Oh<sup>2,4</sup>, S.W. Hur<sup>2,4</sup>, B.N. Lee<sup>1,4</sup>, S.H. Kim<sup>4</sup>,  
J.E. Nör<sup>3</sup>, J.T. Koh<sup>2,4\*</sup>, and Y.C. Hwang<sup>1,4\*</sup>

<sup>1</sup>Department of Conservative Dentistry, School of Dentistry, Dental Science Research Institute, Chonnam National University, Gwangju, Korea; <sup>2</sup>Department of Pharmacology and Dental Therapeutics, Dental Science Research Institute, School of Dentistry, Chonnam National University, Gwangju, Korea; <sup>3</sup>Angiogenesis Research Laboratory, Department of Cariology, Restorative Sciences, Endodontics, University of Michigan, School of Dentistry, Ann Arbor, MI 48109-1078, USA; <sup>4</sup>Research Center for Biomineralization Disorders, Chonnam National University, Gwangju, Korea; and <sup>†</sup>authors contributing equally as first authors; \*corresponding authors, jtkoh@chonnam.ac.kr, ychwang@chonnam.ac.kr

*J Dent Res* DOI: 10.1177/0022034514525199

## Transcriptional Factor ATF6 is Involved in Odontoblastic Differentiation

### APPENDIX

**Appendix Table 1.** Primer Sequences Used in RT-PCR of Rat Tooth Germs

| Gene           | Primer Sequence (5'-3')                            | Temperature (°C) | Product (bp) |
|----------------|----------------------------------------------------|------------------|--------------|
| ATF6 $\alpha$  | F: GGATTGATGCCTTGGGAGT<br>R: ATTTTTTCTTTGGAGTCAG   | 55               | 192          |
| DMP1           | F: GGAGCAAGGTGACAGCGAGT<br>R: GAGACTGGAGGCCTCCTGG  | 60               | 104          |
| DSPP           | F: GGAAGGTGCTGGTTGGAT<br>R: TCCATCTCCTGCGTCTGCAC   | 55               | 89           |
| $\beta$ -Actin | F: GCTGACAGGATGCAGAAGGA<br>R: TGGACAGTGAGGCCAGGATA | 55               | 124          |

**Appendix Table 2.** Primer Sequences Used in RT-PCR of Immortalized Human Dental Pulp Cells (HDPCs)

| Gene           | Primer Sequence (5'-3')                               | Temperature (°C) | Product (bp) |
|----------------|-------------------------------------------------------|------------------|--------------|
| ATF6 $\alpha$  | F: TCCTCGGTCAGTGGACTCTTA<br>R: CTGGGCTGAATTGAAGGTTTTG | 55               | 212          |
| DMP1           | F: GCTAGCTGGTGGCTTCTCCA<br>R: CAGCAATTGGCTGCCACCTG    | 62               | 522          |
| DSPP           | F: CAGCCAAAGAATAGAGGAC<br>R: GGGACCCTTGATTCTAT        | 52               | 133          |
| $\beta$ -Actin | F: ACCCACACTGTGCCCATCTAC<br>R: GCCATCTCCTGCTCGAAGTC   | 55               | 206          |

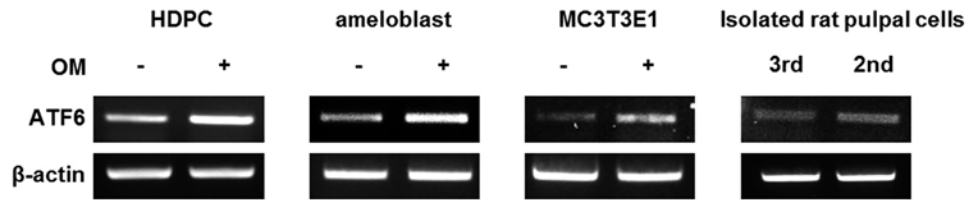

**Appendix Figure.** Expression of ATF6 during the differentiation process. HDPC, ameloblast, and MC3T3E1 cells were cultured with 50  $\mu\text{g}/\text{mL}$  ascorbic acid and 5 mM  $\beta$ -glycerophosphate ( $\beta$ -GP) and harvested for total RNA isolation. RT-PCR was performed. During the differentiation process in each cell type, ATF6 expression was increased.
